# Supplementary material for: Different Responses of Microbiota across Intestinal Tract to Enterococcus faecium HDRsEf1 and Their Correlation with Inflammation in Weaned Piglets
Source: MDPI journal article supplement (doi:10.3390/microorganisms9081767), 2021-08-19
Supplement: s1 [file s1]

| Genes         | Primer sequences (5'-3')                                  | Fragment size(bps) |
|---------------|-----------------------------------------------------------|--------------------|
| IL-1 $\beta$  | F:GCTGGAGGATATAGACCCC<br>R:GTTGGGGTACAGGGCAGAC            | 115                |
| TNF $\alpha$  | F:TTCCAGCTGGCCCCTTGAGC<br>R:GAGGGCATTGGCATACCAC           | 146                |
| IFN- $\gamma$ | F:GCCATTCAAAGGAGCATGGA<br>R:TTCAGTATGGCTTTGCGCT           | 144                |
| GAPDH         | F:GAAGGTCGGAGTGAACGGAT<br>R:CATGGGTAGAATCATACTGGAACA      | 149                |
| IL-12p35      | F:ACCACCTGGACCATCAT<br>R:GGGTTTGTTTGGCCTTCT               | 135                |
| IL-12p40      | F:ATCCTCCCAAGAATCTGC<br>R:TGCCCTGAACTTGAACAC              | 142                |
| NF $\kappa$ B | F: GGCTATAACTCGCTTGGTGACAGG<br>R: CCGCAATGGAGGAGAAGTCTTCG |                    |
| IL-8          | F AGAACTTCGATGCCAGTGC<br>R GGCAGACCTCTTTTCCATTG           | 143                |
